# Supplementary material for: Advances in Exosomes as Diagnostic and Therapeutic Biomarkers for Gynaecological Malignancies
Source: MDPI journal article supplement (doi:10.3390/cancers14194743), 2022-09-28
Supplement: s1 [file s1]

Table S1. The relationship between exosomes and gynaecological malignancies.

| Disease | Source      | Exosomal Cargo                                                 | Type    | Expression Level | Clinical Value                            | References |
|---------|-------------|----------------------------------------------------------------|---------|------------------|-------------------------------------------|------------|
| OC      | Body fluids | miRNA-205                                                      | miRNA   | Up               | Diagnosis                                 | [19]       |
|         |             | FATS                                                           | Protein | Down             | Diagnostic and prognostic markers         | [20]       |
|         |             | miR-200b                                                       | miRNA   | Up               | Diagnosis and therapeutic target          | [21]       |
|         | Cells       | miR-4732-5p                                                    | miRNA   | Up               | Diagnosis and monitoring progress         | [22]       |
|         |             | ANXA2                                                          | Protein | -                | Metastasis                                | [24]       |
|         |             | miR-21-5p                                                      | miRNA   | Up               | Progression and therapeutic target        | [25]       |
|         |             | lncRNA SOX2-OT                                                 | lncRNA  | Up               | Progression and therapeutic target        | [26]       |
|         |             | Circular RNA Foxo3                                             | circRNA | Up               | Progression                               | [27]       |
|         |             | miR-155-5p/PD-L1                                               | miRNA   | Down             | Inhibiting progression                    | [28]       |
|         |             | CD47                                                           | Protein | Up               | Therapeutic target                        | [29]       |
|         |             | miR-29a-3p                                                     | miRNA   | -                | Progression                               | [30]       |
|         |             | miR-330-3p                                                     | miRNA   | -                | Therapeutic target                        | [31]       |
|         |             | circRNA051239                                                  | circRNA | Up               | Metastasis                                | [32]       |
|         |             | CD44                                                           | Protein | -                | Therapeutic target                        | [33]       |
|         |             | miR-6780b-5p                                                   | miRNA   | -                | Metastasis                                | [34]       |
|         |             | miR-130a                                                       | miRNA   | Up               | Angiogenesis                              | [36]       |
|         |             | lncRNA ATB                                                     | lncRNA  | -                | Therapeutic target                        | [37]       |
|         |             | PKR1                                                           | Protein | Down             | Angiogenesis                              | [38]       |
|         |             | miR-92b-3p                                                     | miRNA   | Down             | Anti-angiogenic therapy                   | [39]       |
|         |             | miR-429                                                        | miRNA   | Up               | Chemoresistance and therapeutic target    | [40]       |
|         |             | miR-21-5p                                                      | miRNA   | -                | Chemoresistance and therapeutic target    | [41]       |
|         |             | TMEM205                                                        | Protein | Up               | Chemoresistance and therapeutic target    | [44]       |
|         |             | CLPTM1L                                                        | Protein | Up               | Chemoresistance and therapeutic target    | [45]       |
|         |             | miR-484                                                        | miRNA   | Down             | Chemotherapy sensitization                | [46]       |
|         |             | miR-497                                                        | miRNA   | -                | Overcome chemoresistance                  | [74]       |
| CC      | Body fluids | lncRNA DLX6-AS1                                                | lncRNA  | Up               | Diagnosis                                 | [49]       |
|         |             | miR-125a-5p                                                    | miRNA   | Down             | Diagnosis                                 | [50]       |
|         | Cells       | TIE2                                                           | Protein | Up               | Angiogenesis                              | [52]       |
|         |             | Hedgehog-GLI                                                   | -       | -                | Angiogenesis                              | [53]       |
|         |             | miR-663b                                                       | miRNA   | Up               | Angiogenesis                              | [54]       |
|         |             | miR-1323                                                       | miRNA   | Up               | Progression and therapeutic target        | [55]       |
|         |             | miR-1468-5p                                                    | miRNA   | Up               | Prognostic markers and therapeutic target | [56]       |
|         |             | miR-142-5p                                                     | miRNA   | Up               | Diagnostic marker and therapeutic target  | [57]       |
|         |             | miR-663b                                                       | miRNA   | -                | Metastasis                                | [58]       |
|         |             | lncRNA UCA1                                                    | lncRNA  | Up               | Progression                               | [59]       |
|         |             | lncRNA AGAP2-AS1                                               | lncRNA  | Up               | Therapeutic target                        | [60]       |
|         |             | LINC01305                                                      | lncRNA  | Up               | Progression                               | [61]       |
|         |             | Wnt2B                                                          | Protein | Up               | Therapeutic target                        | [62]       |
| EC      | Body fluids | miR-15a-5p                                                     | miRNA   | Up               | Diagnosis                                 | [64]       |
|         |             | LGELS3BP                                                       | Protein | Up               | Diagnostic and prognostic markers         | [65]       |
|         |             | miR-143-3p,miR-195-5p,miR-20b-5p,miR-204-5p,miR-423-3p,miR-484 | miRNA   | Up               | Diagnosis                                 | [66]       |
|         |             | miR-142-3p,miR-146a-5p,miR-151a-5p                             | miRNA   | Up               | Diagnosis                                 | [67]       |
|         |             | lncRNA NEAT1                                                   | lncRNA  | Up               | Therapeutic target                        | [71]       |
|         | Cells       | hsa_circ_0001610                                               | circRNA | -                | Radioresistance                           | [72]       |
|         |             | miR-26a-5p                                                     | miRNA   | Down             | Metastasis                                | [73]       |

OC:ovarian cancer;CC:cervical cancer;EC:Endometrial Cancer
